# Supplementary material for: Association between TGFβ1 Levels in Cord Blood and Weight Progress in the First Year of Life
Source: MDPI journal article supplement (doi:10.3390/biomedicines11082220), 2023-08-08
Supplement: s1 [file s1]

| Table S1: Multivariate regression analysis of birthweight with cord TGFβ1 |                     |                     |                         |
|---------------------------------------------------------------------------|---------------------|---------------------|-------------------------|
|                                                                           | β <sub>10,000</sub> | p                   | R <sup>2</sup> adjusted |
| <b>Variable:</b> Birthweight                                              |                     |                     | 0.10                    |
| <b>Predictors:</b> Cord TGFβ1                                             | 50                  | 0.21                |                         |
| Male sex                                                                  | 23e+5               | 0.01*               |                         |
| <b>Variable:</b> Birthweight                                              |                     |                     | 0.20                    |
| <b>Predictors:</b> Cord TGFβ1                                             | 88                  | 0.02*               |                         |
| GA                                                                        | 14e+5               | <10 <sup>-3</sup> * |                         |
| <b>Variable:</b> Birthweight SDS                                          |                     |                     | 0.04                    |
| <b>Predictors:</b> Cord TGFβ1                                             | <10 <sup>-3</sup>   | 0.22                |                         |
| Male Sex                                                                  | 2940                | 0.11                |                         |
| <b>Variable:</b> Birthweight SDS                                          |                     |                     | 0.19                    |
| <b>Predictors:</b> Cord TGFβ1                                             | <10 <sup>-3</sup>   | 0.03*               |                         |
| GA                                                                        | 2784                | <10 <sup>-3</sup> * |                         |

| Table S2: Univariate regression analysis of birthweight with cord TGFβ1 |                     |      |                         |
|-------------------------------------------------------------------------|---------------------|------|-------------------------|
|                                                                         | β <sub>10,000</sub> | p    | R <sup>2</sup> adjusted |
| <b>Variable:</b> Birthweight                                            |                     |      | 0.02                    |
| <b>Predictor:</b> Cord TGFβ1                                            | 72                  | 0.07 |                         |
| <b>Variable:</b> Birthweight SDS                                        |                     |      | 0.02                    |
| <b>Predictor:</b> Cord TGFβ1                                            | <10 <sup>-3</sup>   | 0.11 |                         |

Table S3: Multivariate regression analysis of weight at 1 month (U3) with cord TGFβ1

|                                | β <sub>10,000</sub> | p                   | R <sup>2</sup> adjusted |
|--------------------------------|---------------------|---------------------|-------------------------|
| <b>Variable:</b> U3 weight     |                     |                     | 0.30                    |
| <b>Predictors:</b> Cord TGFβ1  | 156                 | <10 <sup>-2</sup> * |                         |
| Male sex                       | 49e+5               | <10 <sup>-3</sup> * |                         |
| <b>Variable:</b> U3 weight     |                     |                     | 0.53                    |
| <b>Predictors:</b> Cord TGFβ1  | 136                 | <10 <sup>-2</sup> * |                         |
| Birthweight                    | 9325                | <10 <sup>-4</sup> * |                         |
| <b>Variable:</b> U3 weight SDS |                     |                     | 0.15                    |
| <b>Predictors:</b> Cord TGFβ1  | <10 <sup>-3</sup>   | 0.02*               |                         |
| Male Sex                       | 4189                | 0.02*               |                         |

Table S4: Univariate regression analysis of weight at 1 month (U3) with cord TGFβ1

|                                | β <sub>10,000</sub> | p                   | R <sup>2</sup> adjusted |
|--------------------------------|---------------------|---------------------|-------------------------|
| <b>Variable:</b> U3 weight     |                     |                     | 0.14                    |
| <b>Predictor:</b> Cord TGFβ1   | 203                 | <10 <sup>-3</sup> * |                         |
| <b>Variable:</b> U3 weight SDS |                     |                     | 0.09                    |
| <b>Predictor:</b> Cord TGFβ1   | <10 <sup>-3</sup>   | <10 <sup>-2</sup>   |                         |

SDS: Standard Deviation Score (Kromeyer-Hauschild), GA: gestational age, U3=Examination at 1 month of age, U6: Examination at 1 year of age

Table S5: Multivariate regression analysis of weight at 1 year (U6) with cord TGFβ1

|                                | $\beta_{10,000}$  | p                   | R <sup>2</sup> adjusted |
|--------------------------------|-------------------|---------------------|-------------------------|
| <b>Variable:</b> U6 weight     |                   |                     | 0.19                    |
| <b>Predictors:</b> Cord TGFβ1  | 201               | 0.03*               |                         |
| Male sex                       | 68e+5             | <10 <sup>-2</sup> * |                         |
| <b>Variable:</b> U6 weight     |                   |                     | 0.12                    |
| <b>Predictors:</b> Cord TGFβ1  | 227               | 0.02*               |                         |
| Birthweight                    | 5669              | 0.04*               |                         |
| <b>Variable:</b> U6 weight SDS |                   |                     | 0.04                    |
| <b>Predictors:</b> Cord TGFβ1  | <10 <sup>-3</sup> | 0.03*               |                         |
| Male Sex                       | -138              | 0.93                |                         |

Table S6: Univariate regression analysis of weight at 1 year (U6) with cord TGFβ1

|                                | $\beta_{10,000}$  | p                   | R <sup>2</sup> adjusted |
|--------------------------------|-------------------|---------------------|-------------------------|
| <b>Variable:</b> U6 weight     |                   |                     | 0.08                    |
| <b>Predictor:</b> Cord TGFβ1   | 268               | <10 <sup>-2</sup> * |                         |
| <b>Variable:</b> U6 weight SDS |                   |                     | 0.05                    |
| <b>Predictor:</b> Cord TGFβ1   | <10 <sup>-3</sup> | 0.03*               |                         |

SDS: Standard Deviation Score (Kromeyer-Hauschild), GA: gestational age, U3=Examination at 1 month of age, U6: Examination at 1 year of age

**Table S7: Spearman's Rank Correlation of cord TGFβ1 levels and child growth parameters**

|                                           | GA    | P Values  |               |             |                 |           |               |            |          |
|-------------------------------------------|-------|-----------|---------------|-------------|-----------------|-----------|---------------|------------|----------|
|                                           |       | U6 Weight | U6 Weight SDS | Birthweight | Birthweight SDS | U3 Weight | U3 Weight SDS | Cord TGFβ1 | Male Sex |
| GA                                        |       | 0.089     | 0.067         | 0.001       | 0.001           | 0.054     | 0.078         | 0.460      | 0.433    |
| U6 Weight                                 | -     |           | <0.001        | 0.012       | 0.028           | 0.000     | 0.000         | 0.016      | 0.001    |
| U6 Weight SDS                             | -     | 0.884     |               | 0.012       | 0.010           | 0.002     | 0.000         | 0.074      | 0.791    |
| Birthweight                               | 0.370 | 0.285     | 0.283         |             | <0.001          | <0.001    | <0.001        | 0.076      | 0.006    |
| Birthweight SDS                           | 0.362 | 0.249     | 0.292         | 0.989       |                 | <0.001    | <0.001        | 0.102      | 0.082    |
| U3 Weight                                 | -     | 0.470     | 0.347         | 0.671       | 0.627           |           | <0.001        | 0.003      | <0.001   |
| U3 Weight SDS                             | -     | 0.474     | 0.448         | 0.694       | 0.683           | 0.922     |               | 0.040      | 0.011    |
| Cord TGFβ1                                | -     | 0.273     | -             | -           | -               | 0.335     | 0.235         |            | 0.034    |
| Male Sex                                  | -     | 0.373     | -             | 0.308       | -               | 0.498     | 0.287         | 0.239      |          |
| Spearman's Rank Correlation Coefficient R |       |           |               |             |                 |           |               |            |          |

P values are shown in blue, Spearman's Rank Correlation coefficient is shown in red for significant correlations

SDS: Kromeyer-Hauschild Standard Deviation Score, GA: gestational age, U3: Examination at 1 month, U6: Examination at 1 year
